# Supplementary material for: The Influence of Betulin and Its Derivatives EB5 and ECH147 on the Antioxidant Status of Human Renal Proximal Tubule Epithelial Cells
Source: MDPI journal article supplement (doi:10.3390/ijms23052524), 2022-02-25
Supplement: s1 [file s1]

## Supplementary materials

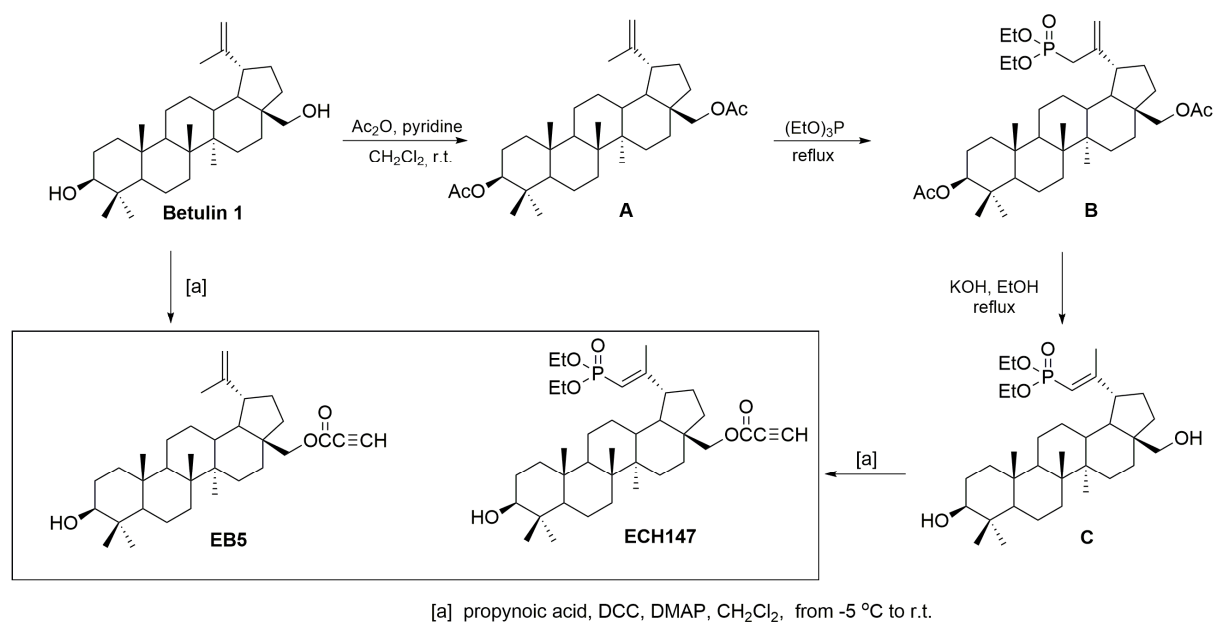

**Scheme S1.** Synthesis of 28-propynoyl-substituted derivatives of betulin EB5 -and EB147.

**Table S1.** Cytotoxic activity tested derivatives of betulin against various cancer cell lines.

| Compound | Cell line                        | IC <sub>50</sub> | [References] |
|----------|----------------------------------|------------------|--------------|
| EB5      | breast cancer: T47D              | (18.4 μM)        | [10]         |
|          | leukemia: CCRF/CEM               | (0.04 μM)        |              |
|          | colorectal adenocarcinoma: SW707 | (30.2 μM)        |              |
|          | murine leukemia: P388            | (0.81 μM)        |              |
|          | leukemia: HL-60                  | (0.61 μM)        | [11]         |
|          | breast cancer: MCF-7             | (102.1 μM)       | [12]         |
|          | glioblastoma: SNB-19             | (4.2 μM)         |              |
|          | melanoma: Colo-829               | (1.7 μM)         |              |
|          | melanoma: C-32                   | (16.7 μM)        |              |
|          | breast cancer: SK-BR-3           | (3.83 μM)        | [13]         |
| ECH147   | glioblastoma: T98G               | (16.23 μM)       | [14]         |
|          | rat glioma: C6                   | (9.11 μM)        |              |
|          | neuroblastoma: SK-N-AS           | (0.62 μM)        | [15]         |
|          | rhabdomyosarcoma: TE671          | (1.34 μM)        |              |
| ECH147   | breast cancer: T47D              | (0.70 μM)        | [16]         |
|          | glioblastoma: SNB-19             | (0.43 μM)        |              |
|          | melanoma: C-32                   | (0.60 μM)        |              |

**Table S2.** Physicochemical and characteristic spectral data for compound EB5 and ECH147.

| Characteristics of compounds                          | EB5                                                                                                                                                                                                | ECH147                                                                                                                                                                                                                                                                                                                                                                                         |
|-------------------------------------------------------|----------------------------------------------------------------------------------------------------------------------------------------------------------------------------------------------------|------------------------------------------------------------------------------------------------------------------------------------------------------------------------------------------------------------------------------------------------------------------------------------------------------------------------------------------------------------------------------------------------|
| Melting point                                         | 133–135°C                                                                                                                                                                                          | 190–191°C                                                                                                                                                                                                                                                                                                                                                                                      |
| R <sub>f</sub>                                        | 0.46 (chloroform/ethanol, 20:1, v/v)                                                                                                                                                               | 0.52 (dichloromethane/ethanol, 15:1, v/v)                                                                                                                                                                                                                                                                                                                                                      |
| <sup>1</sup> H-NMR (600 MHz)<br>δ <sub>H</sub> [ppm]  | 1.69 (3H, H-30); 2.45 (m, 1H, H-19); 2.91 (s, 1H, C≡CH); 3.21 (m, 1H, H-3); 4.01 (d, <i>J</i> = 10.8 Hz, 1H, H-28); 4.41 (d, <i>J</i> = 10.8 Hz, 1H, H-28); 4.71 (s, 1H, H-29); 4.61 (s, 1H, H-29) | 1.33 (m, 6H, 2x OCH <sub>2</sub> CH <sub>3</sub> ); 1.06–2.01 2.07 (d, <i>J</i> = 3Hz, 3H, H-30); 2.47 (m, 1H, H-19); 2.93 (s, 1H, C≡CH); 3.20 (m, 1H, H-3); 3.97 (d, <i>J</i> = 10.8 Hz, 1H, H-28); 4.05 (m, 4H, 2xOCH <sub>2</sub> CH <sub>3</sub> ) 4.39 (d, <i>J</i> = 10.8 Hz, 1H, H-28); 5.43 (d, 1H, <sup>2</sup> <i>J</i> <sub>PH</sub> = 18 Hz, H-29).                                |
| <sup>13</sup> C-NMR (150 MHz)<br>δ <sub>C</sub> [ppm] | 21.8 (C-30); 47.7 (C-19); 64.9 (C-28); 74.7 (C≡C); 74.8 (C≡C); 78.9 (C-3); 110.0 (C-29); 149.9 (C-20); 153.3 (O-C=O)                                                                               | 16.0 (OCH <sub>2</sub> CH <sub>3</sub> ); 16.1 (OCH <sub>2</sub> CH <sub>3</sub> ); 17.5 (d, <sup>3</sup> <i>J</i> <sub>CP</sub> = 7.8 Hz, C-30); 51.4 (C-19); 61.1 (OCH <sub>2</sub> CH <sub>3</sub> ); 61.2 (OCH <sub>2</sub> CH <sub>3</sub> ); 64.6 (C-28); 74.6 (C≡C); 74.9 (C≡C); 78.9 (C-3); 111.9 (d, <sup>1</sup> <i>J</i> <sub>CP</sub> = 183 Hz, C-29); 153.2 (O-C=O); 166.8 (C-20) |
| <sup>31</sup> P-NMR (243 MHz)<br>δ <sub>P</sub> [ppm] | -                                                                                                                                                                                                  | 18.25                                                                                                                                                                                                                                                                                                                                                                                          |

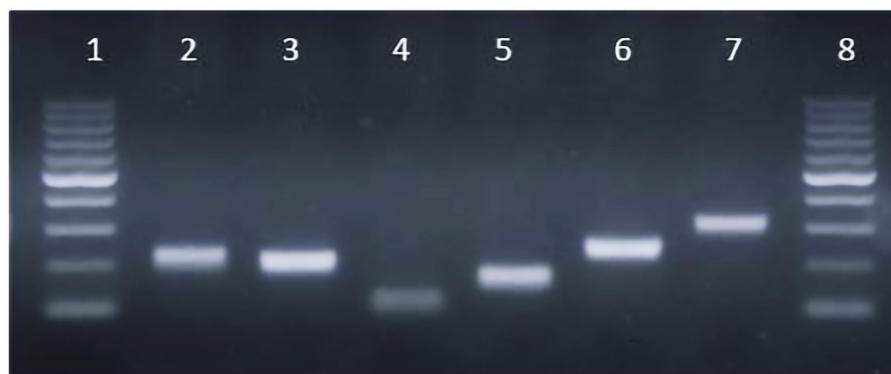

**Figure S1.** The result of the electrophoretic separation of RT-qPCR products. Lane 1 and 8 – product size marker (Perfect™ 100-1000 bp DNA Ladder, EURx, Polska), lane 2: *SOD1* (208 bp), lane 3: *SOD2*, (199bp), lane 4: *GPX3* (107bp), lane 5: *CAT* (161bp), lane 6: *GAPDH* (226bp), lane 7: *β-Actin* (295bp)
